# Supplementary material for: Sequence Compression Benchmark (SCB) database — a comprehensive evaluation of reference-free compressors for FASTA-formatted sequences
Source: bioRxiv or medRxiv preprint supplement (doi:10.1101/642553), 2019-12-27
Supplement: Supplementary file [file media-2.pdf]

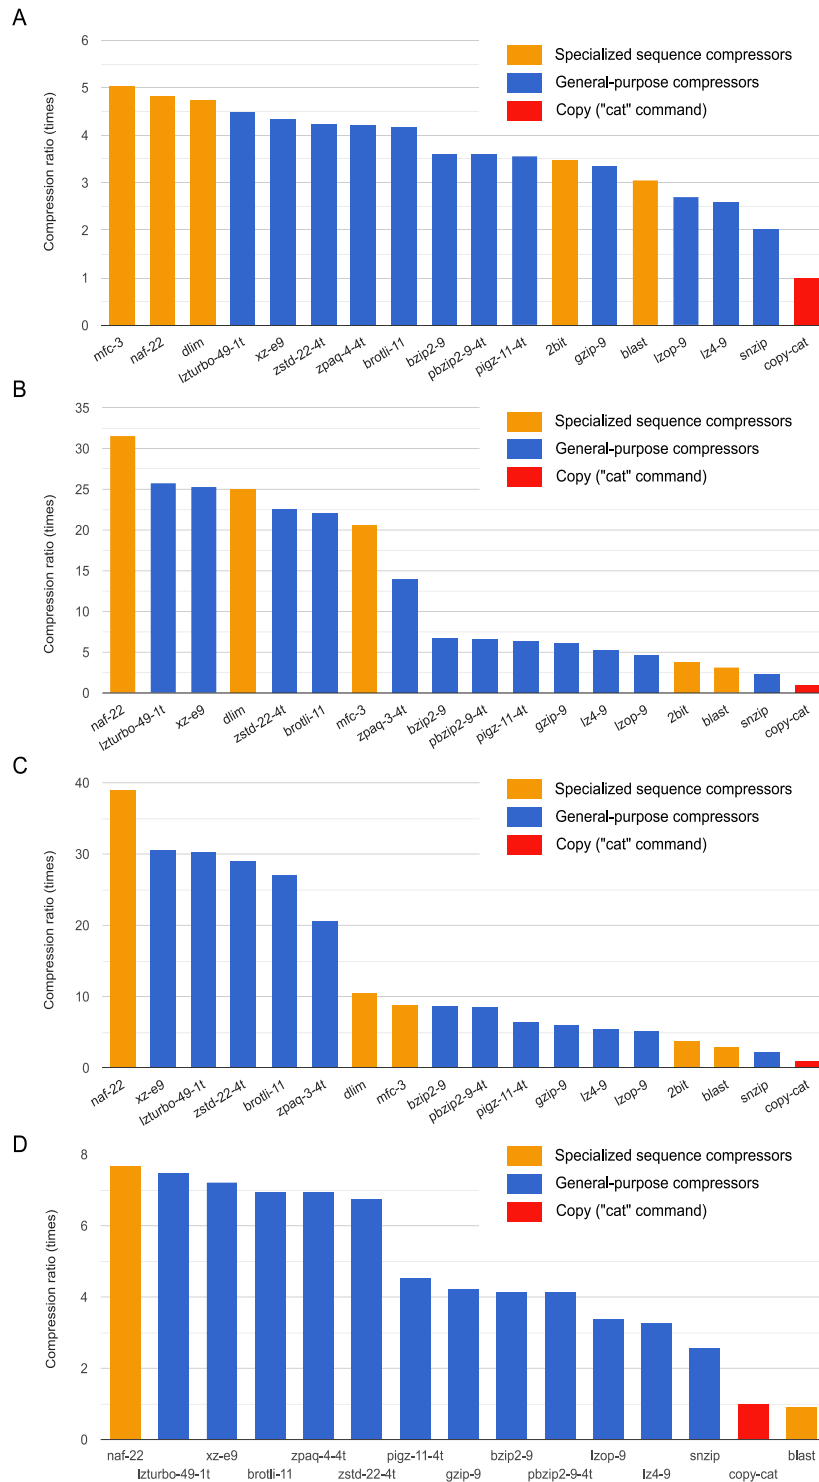

**Fig. S1.** Best settings of each compressor compared in compactness on four kinds of test data: (A) Genomes larger than 10 MB, (B) Repetitive DNA datasets, (C) RNA datasets, and (D) Protein datasets. See Table S2 for the list of datasets. Column colors: orange - sequence compressors, blue - general-purpose compressors, red - copy compressor ("cat" command).

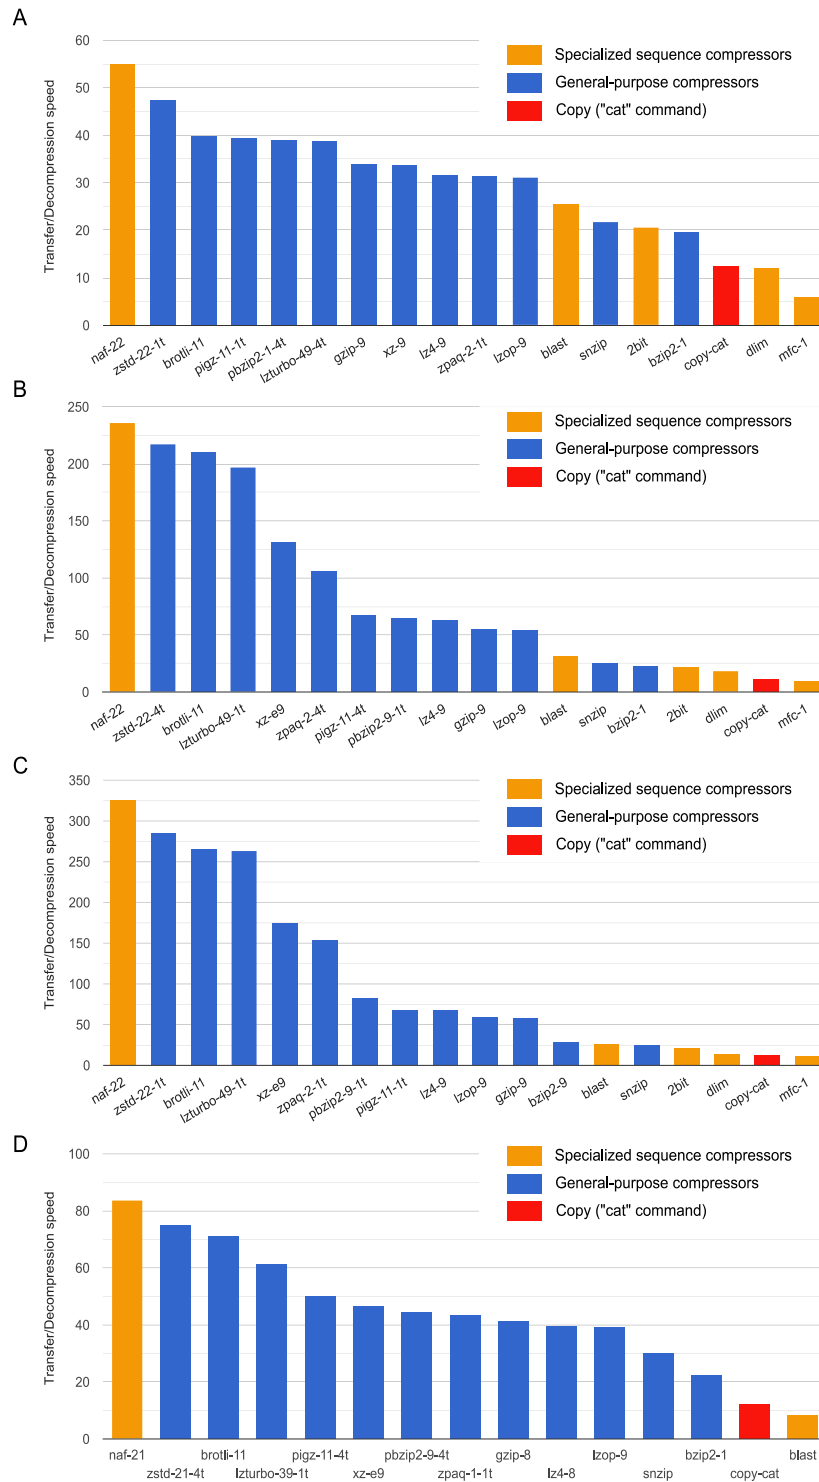

**Fig. S2.** Best settings of each compressor in terms of transfer/decompression speed, compared on four kinds of test data: (A) Genomes larger than 10 MB, (B) Repetitive DNA datasets, (C) RNA datasets, and (D) Protein datasets. See Table S2 for the list of datasets. Column colors: orange - sequence compressors, blue - general-purpose compressors, red - copy compressor ("cat" command). Link speed of 100 Mbit/s was used for estimating the transfer time.

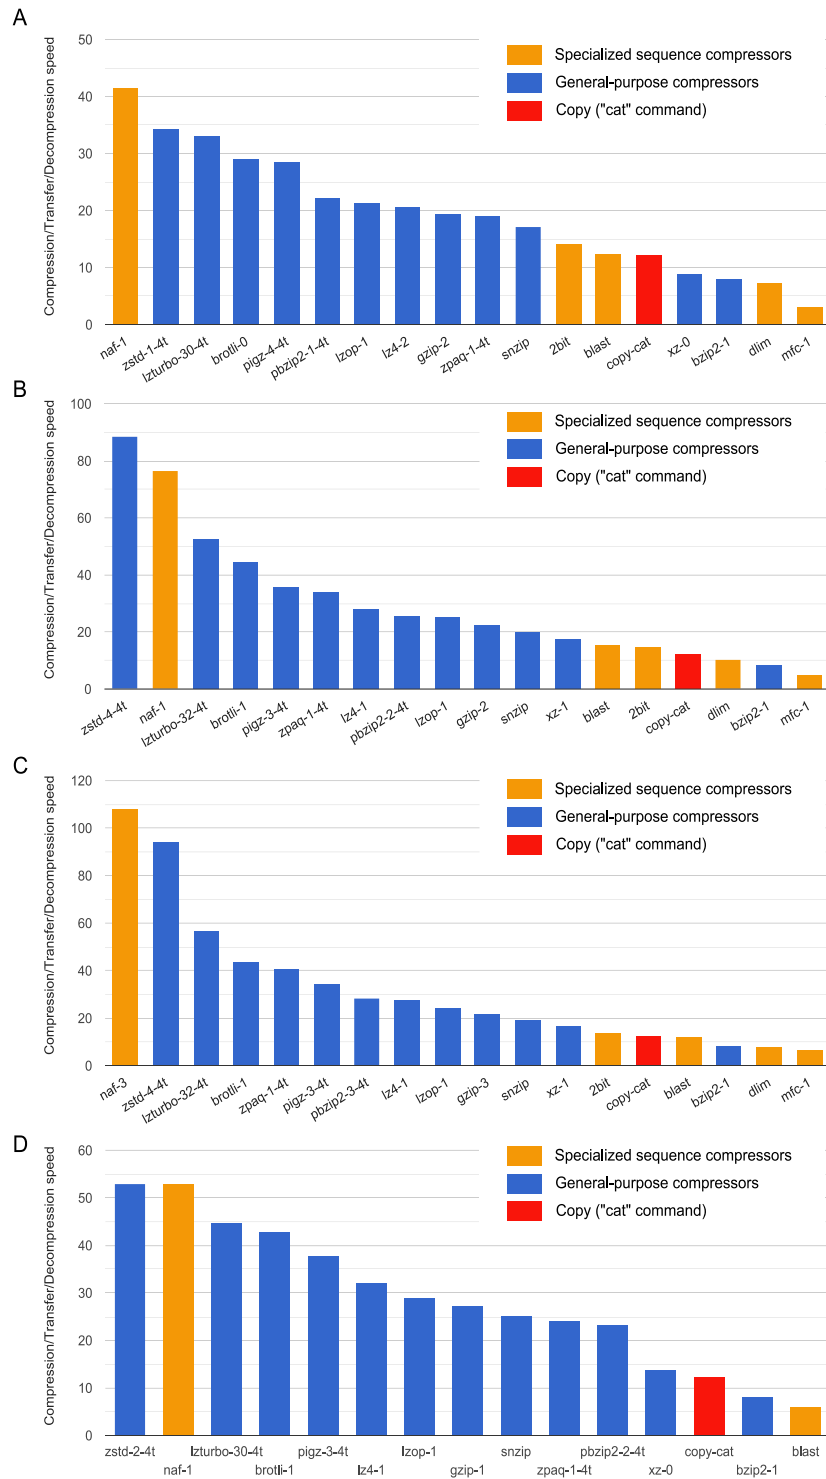

**Fig. S3.** Best settings of each compressor in terms of compression/transfer/decompression speed, compared on four kinds of test data: (A) Genomes larger than 10 MB, (B) Repetitive DNA datasets, (C) RNA datasets, and (D) Protein datasets. See Table S2 for the list of datasets. Column colors: orange - sequence compressors, blue - general-purpose compressors, red - copy compressor ("cat" command). Link speed of 100 Mbit/s was used for estimating the transfer time.

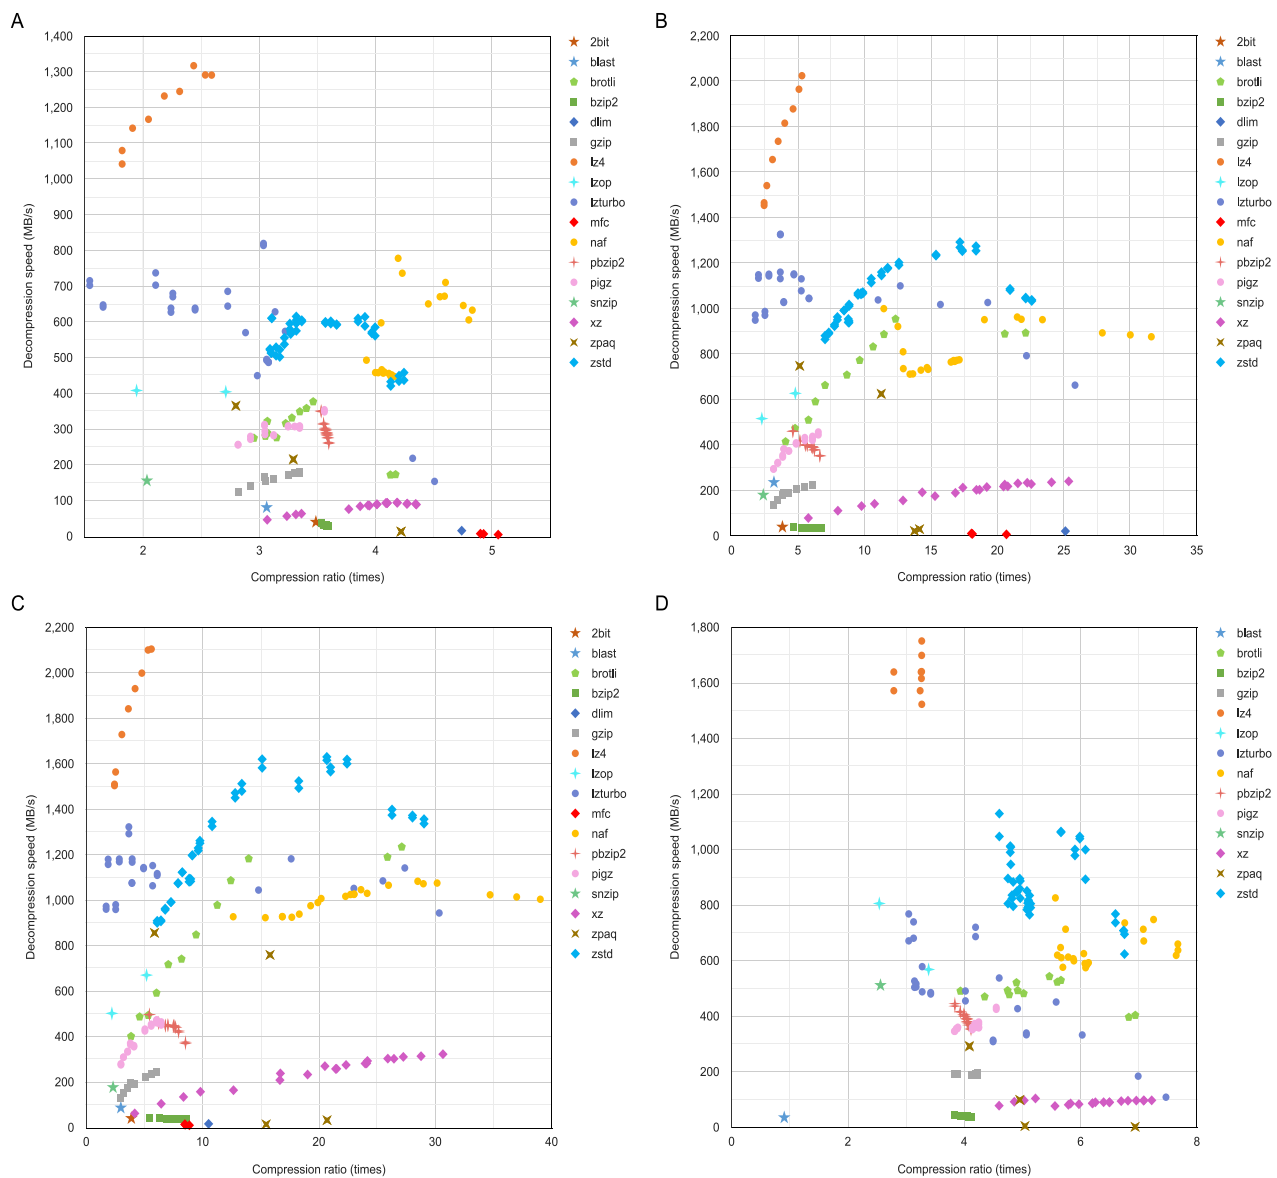

**Fig. S4.** Compression ratio and decompression speed of all compressor settings, on four kinds of test data: (A) Genomes larger than 10 MB, (B) Repetitive DNA datasets, (C) RNA datasets, and (D) Protein datasets.

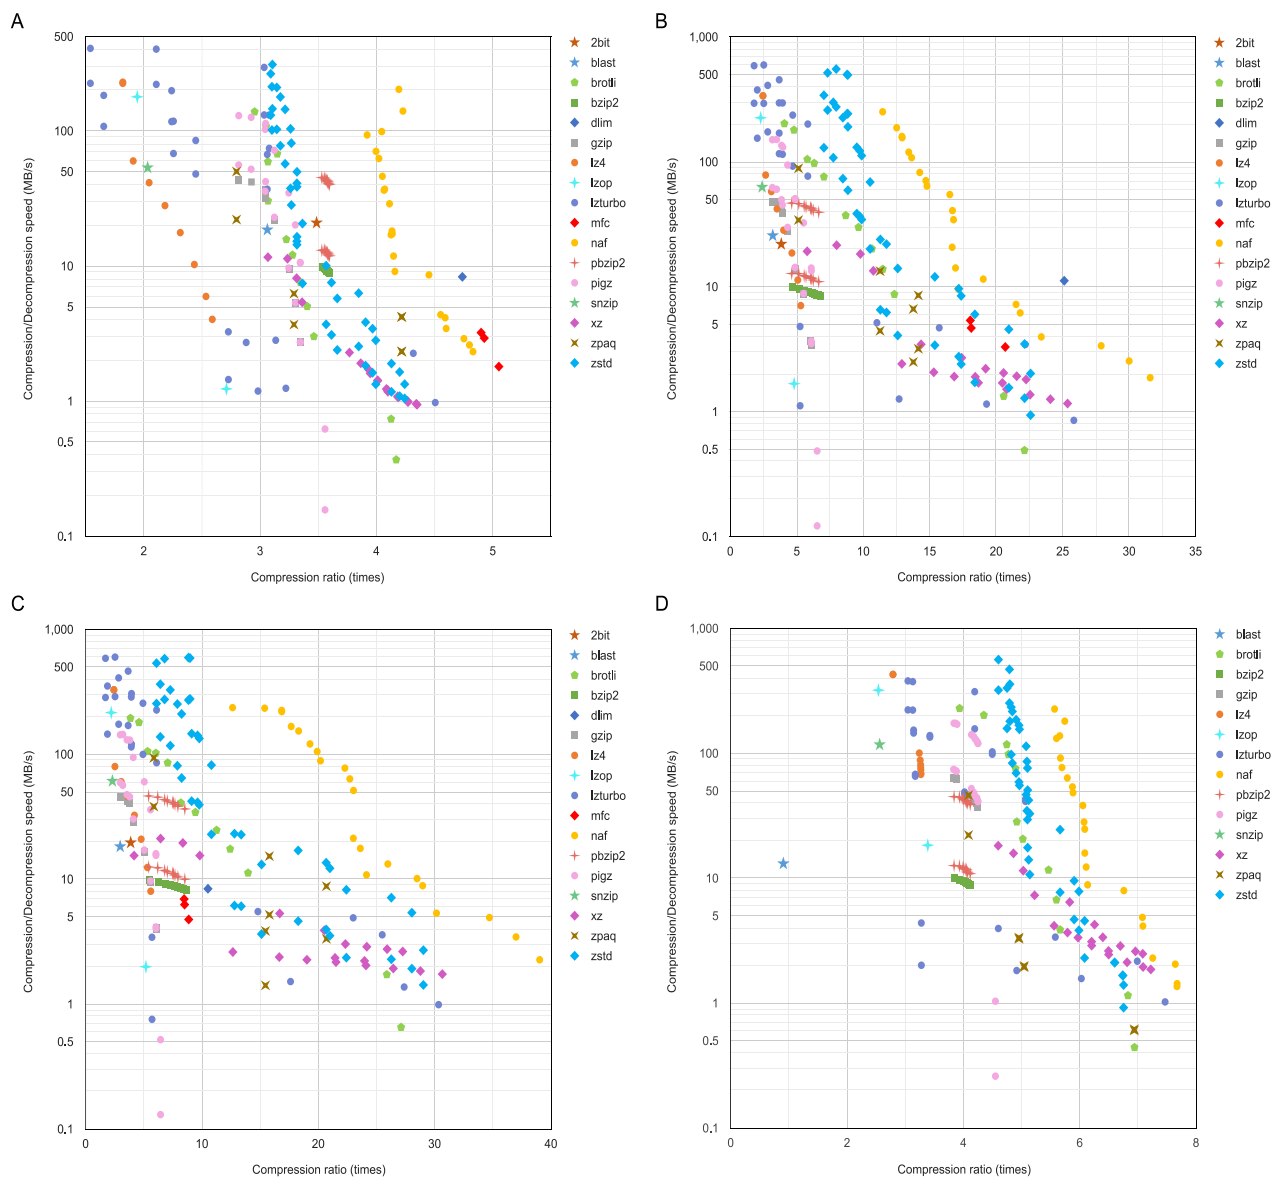

**Fig. S5.** Compression ratio and compression/decompression speed of all compressor settings, on four kinds of test data: (A) Genomes larger than 10 MB, (B) Repetitive DNA datasets, (C) RNA datasets, and (D) Protein datasets. Vertical axis uses logarithmic scale.

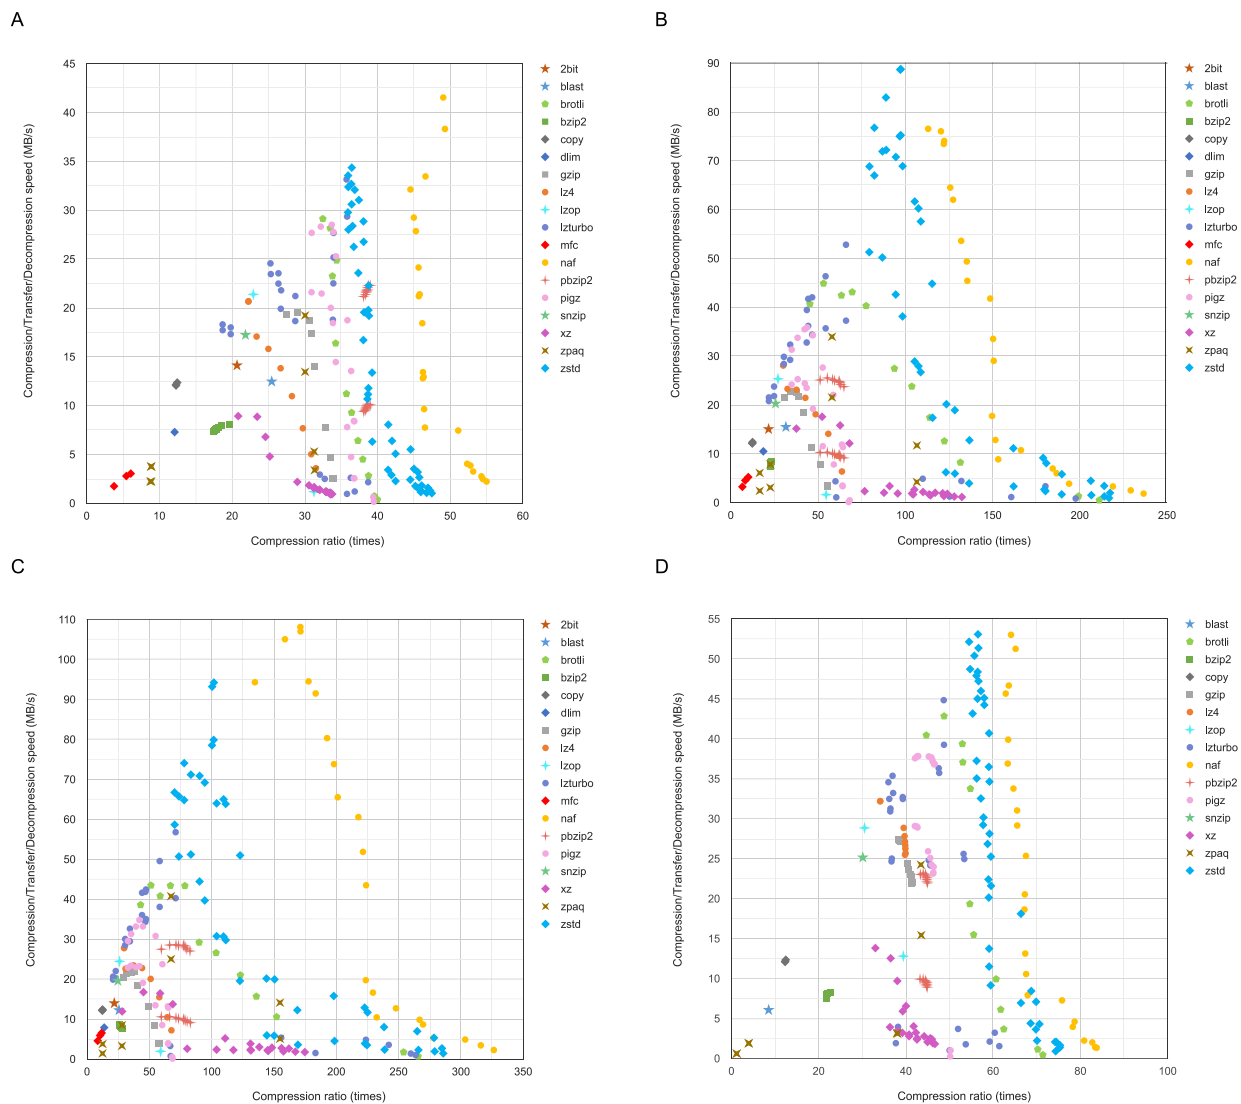

**Fig. S6.** Compression ratio and compression/decompression speed of all compressor settings, on four kinds of test data: (A) Genomes larger than 10 MB, (B) Repetitive DNA datasets, (C) RNA datasets, and (D) Protein datasets.

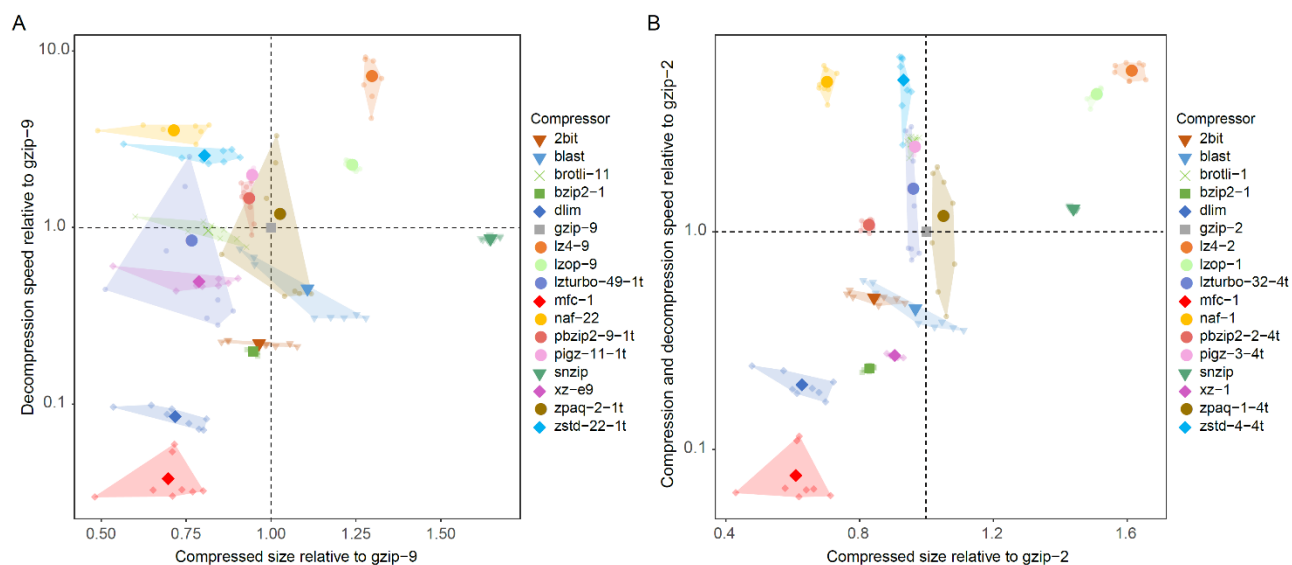

**Fig. S7.** Relative performance of compressors compared to gzip. Only best version of each compressor is shown, in terms of: (A) Transfer/Decompression speed and (B) Compression/Transfer/Decompression speed. Different points of the same color show performance of the same compressor and setting on different test datasets. Genomes larger than 10 MB are used as test data.
